# Supplementary material for: Do exercise-associated genes explain phenotypic variance in the three components of fitness? a systematic review & meta-analysis
Source: PubMed Central journal article supplement (PMC8516263; doi:10.1371/journal.pone.0249501), 2021-10-14
Supplement: pone.0249501.s004.pdf [file pone.0249501.s004.pdf]

## Meta-analysis on Genetic Association Studies Checklist | PLOS ONE

|   | Item                                                                                                                                                                                                                                                                    | Section name and paragraph number within manuscript                                                                                                                                                                                                                                                                                                         |
|---|-------------------------------------------------------------------------------------------------------------------------------------------------------------------------------------------------------------------------------------------------------------------------|-------------------------------------------------------------------------------------------------------------------------------------------------------------------------------------------------------------------------------------------------------------------------------------------------------------------------------------------------------------|
|   | <b>Introduction</b>                                                                                                                                                                                                                                                     |                                                                                                                                                                                                                                                                                                                                                             |
| 1 | Provide a detailed justification for the polymorphism studied; if a single polymorphism was analyzed, give details as to why others were not included in the meta-analysis.                                                                                             | Identified in the Results section, line number 168 and shown in figures 2, 3 and 4.<br>One aim of the MA was to identify the many genes and polymorphisms associated to the three componenets of fitness, therefore, details of them were not in the introduction.<br>Why other genes were not included is reffered to in the limitations section line 410. |
| 2 | Provide a detailed justification for the population(s) and clinical condition studied.                                                                                                                                                                                  | Justification of the group is in the introduction lines 62, 86 and 93.<br>Expanded and identified in the Methods section lines 115-120.                                                                                                                                                                                                                     |
|   | <b>Methods</b>                                                                                                                                                                                                                                                          |                                                                                                                                                                                                                                                                                                                                                             |
| 3 | Provide full details of the search strategy employed; outline the full electronic search strategy –specific combination of keywords and any limits applied- for at least one database. Specify whether synonyms of polymorphisms/genes (e.g. SNP number) were searched. | The exact searches, keywords and terms used is provided in the supplimentary document 'supporting information' table S1. This included boolean operators, synonyms and other search technques.<br>This is breifly mentioned within the manuscript in the methods section first paragraph.                                                                   |
| 4 | Report full details on the inclusion and exclusion criteria applied for selecting studies. <i>Please list the excluded articles and the reasons for exclusion of each article in a supplementary file.</i>                                                              | Eligibility criteria section includes PICO stratrergy which was used as trhe criteria for inclusion and exclusion (lines 115-129).                                                                                                                                                                                                                          |

|    |                                                                                                                                                |                                                                                                                                                                                                     |
|----|------------------------------------------------------------------------------------------------------------------------------------------------|-----------------------------------------------------------------------------------------------------------------------------------------------------------------------------------------------------|
| 5  | Provide details on how the quality of the studies included in the analyses was assessed.                                                       | COSMIN check list (lines 130-142) results are in 'supporting information' document table S2.                                                                                                        |
| 6  | Describe steps taken to contact study authors to identify additional studies and to request missing data.                                      | Methods section lines 108-110.                                                                                                                                                                      |
| 7  | Describe how environmental effects were adjusted for, if this adjustment was not conducted, outline the reasons for this.                      | NA, however, the study effects were adjusted for and explained in lines 398-406.                                                                                                                    |
| 8  | Describe the methods of handling heterogeneity/between-study variance.                                                                         | Heterogeneity was assessed and stated in lines 158-161 in statistical analysis section. This was controlled with subgroup analysis lines 161-164 and explained in discussion section lines 398-406. |
| 9  | Describe how the Hardy-Weinberg equilibrium and linkage disequilibrium were assessed.                                                          | NA                                                                                                                                                                                                  |
| 10 | Describe and justify the choice of model for the analyses (per-allele vs per-genotype vs genetic model-free, random effects vs fixed effects). | Statistical methods section briefly explains how the data was handled. Discussion section lines 312-314 and 347-348 explain limitations of studies forcing a per genotype vs genotype approach.     |
| 11 | Describe whether a sensitivity analysis has been completed.                                                                                    | The study search and flow diagram was repeated as explained in figure 1 caption. COSMIN was assessed twice for sensitive outcomes S2.                                                               |
| 12 | Describe whether an assessment of the effects of population stratification has been conducted.                                                 | conducted in Statistical methods section (line 156).                                                                                                                                                |
| 13 | Describe whether study-specific results have been assessed and if so the reasons for this (e.g. forest plot).                                  | Described and explained in the Statistical methods section.                                                                                                                                         |
|    | <b>Results</b>                                                                                                                                 |                                                                                                                                                                                                     |
| 14 | Include flow diagram for the studies included in the meta-analysis as the first figure for the manuscript                                      | Figure one is uploaded separately at Fig 1 (tiff file) this is addressed in results section line 168.                                                                                               |

|    |                                                                                                                                                                                                                                 |                                                                             |
|----|---------------------------------------------------------------------------------------------------------------------------------------------------------------------------------------------------------------------------------|-----------------------------------------------------------------------------|
| 15 | Report details on allele/genotype prevalence.                                                                                                                                                                                   | Results section, figures 2, 3, 4 and tables 1, 2, 3.                        |
| 16 | Report the effect size estimates and p values for each analysis.                                                                                                                                                                | Results section, Figures 2, 3 and 4 and lines 188-193, 226-230 and 248-251. |
|    | <b>Discussion</b>                                                                                                                                                                                                               |                                                                             |
| 17 | Discuss the limitations of the meta-analysis, including genotyping errors/bias and publication bias.                                                                                                                            | Discussion section lines 412-431.                                           |
| 18 | If the meta-analysis identifies an association within a subgroup of the population studied but not another, discuss the implications of these results, and if applicable the possibility of subgroup-specific publication bias. | NA                                                                          |
| 19 | Discuss the suitability of the sample size employed to the research question and the power of the study.                                                                                                                        | NA                                                                          |
